# Supplementary material
Source: PubMed Central journal article supplement (PMC10236337)
Supplement: jamaoncol-e231352-s003.pdf [file jamaoncol-e231352-s003.pdf]

## Data Sharing Statement

Castelli. Weekly Adaptive Radiotherapy vs Standard Intensity-Modulated Radiotherapy for Improving Salivary Function in Patients With Head and Neck Cancer. *JAMA Oncol*. Published June 01, 2023. doi:10.1001/jamaoncol.2023.1352

### Data

**Data available:** No
